# Supplementary material for: Effects of Metformin on Hepatic Steatosis in Adults with Nonalcoholic Fatty Liver Disease and Diabetes: Insights from the Cellular to Patient Levels
Source: PubMed Central journal article supplement — Gut Liver. 2021 Nov 15;15(6):827–40. doi: 10.5009/gnl20367 (PMC8593497; doi:10.5009/gnl20367), 2021-11-15
Supplement: gnl-15-6-827-supple.pdf [file gnl-15-6-827-supple.pdf]

**Supplementary Table 1.** Mechanisms Associated with Metformin and Lipogenesis Reduction: Evidence from *In Vitro* Reports

| Author (year)                               | Cell types                                                            | Model                                                                  | Metformin dose                 | Time (min) | Effects                                                                                                                                                                                                                                                                                                                                                                          | Interpretations                                                                                                                                                                                                                               |
|---------------------------------------------|-----------------------------------------------------------------------|------------------------------------------------------------------------|--------------------------------|------------|----------------------------------------------------------------------------------------------------------------------------------------------------------------------------------------------------------------------------------------------------------------------------------------------------------------------------------------------------------------------------------|-----------------------------------------------------------------------------------------------------------------------------------------------------------------------------------------------------------------------------------------------|
| Fullerton <i>et al.</i> (2013) <sup>1</sup> | C57bl/6 mice primary hepatocytes                                      | Palmitate (0.5 mmol)/ 18 hours                                         | 0.5 mmol                       | 1,080      | ↓ Lipogenesis                                                                                                                                                                                                                                                                                                                                                                    | Metformin decreased <i>de novo</i> hepatic lipogenesis.                                                                                                                                                                                       |
| Song <i>et al.</i> (2015) <sup>2</sup>      | HepG2 cell                                                            | Oleic acid (1 mmol) and glucose (30 mmol)/8 hours                      | 0.5 mmol<br>0.1, 0.5, 1.0 mmol | 120<br>120 | ↓ Lipid accumulation<br>↑ SIRT1 activity and expression<br>↑ Autophagy<br>↑ P-ACC                                                                                                                                                                                                                                                                                                | Metformin restored SIRT1-mediated autophagy.                                                                                                                                                                                                  |
|                                             | C57bl/6 mice primary hepatocytes                                      | Oleic acid (2 mmol) and glucose (30 mmol)/8 hours                      | 0.5 mmol<br>0.1, 0.5, 1.0 mmol | 120<br>120 | ↓ Lipid accumulation<br>↑ SIRT1 activity and expression<br>↑ Autophagy<br>↑ P-ACC                                                                                                                                                                                                                                                                                                |                                                                                                                                                                                                                                               |
| Ford <i>et al.</i> (2015) <sup>3</sup>      | C57bl/6 mice primary hepatocytes                                      | Mice fed with HFD                                                      | Various doses<br>0.1 mmol      | 240<br>120 | ↓ Lipogenesis (dose-dependent)<br>↔ Lipogenesis<br>↔ P-ACC<br>↔ Fatty acid oxidation<br>↓ Lipogenesis (dose-dependent)<br>↓ Lipogenesis<br>↔ P-ACC/ACC                                                                                                                                                                                                                           | Metformin treatment resulted in dose-dependent lipogenesis inhibition.                                                                                                                                                                        |
|                                             | Human primary hepatocytes                                             | Palmitate (200 μmol), L-carnitine (500 μmol)                           | Various doses<br>0.1 mmol      | 60<br>120  | ↔ Fatty acid oxidation<br>↓ Lipogenesis (dose-dependent)<br>↓ Lipogenesis<br>↔ P-ACC/ACC                                                                                                                                                                                                                                                                                         |                                                                                                                                                                                                                                               |
| Huang <i>et al.</i> (2018) <sup>4</sup>     | C57bl/6 mice primary hepatocytes                                      |                                                                        | 0.5, 1, 2, 5 mmol              | 180–360    | ↓ Lipogenic rates (1, 2, 5 mmol)<br>↓ ROCK1 activity (2, 5 mmol)<br>↑ AMPK activity (2, 5 mmol)<br>↑ FAS, SCD1, ACC, SREBP-1c (dose not specified)<br>↔ AMPK activity<br>↔ FAS, SCD1, ACC, SREBP-1c (dose not specified)                                                                                                                                                         | Metformin suppressed ROCK1 activity, resulting in AMPK activation and decreased lipogenic rates.                                                                                                                                              |
| Li <i>et al.</i> (2019) <sup>5</sup>        | L-ROCK1 <sup>-/-</sup> primary hepatocytes<br>AML12 mouse hepatocytes | MCD medium/<br>24 hours                                                | 5, 10, 20, mmol                | 120        | ↓ STAT3 protein and mRNA expression (dose-dependent)<br>↑ Autophagy (dose-dependent)<br>↓ IL-1β, IL-6, TNF-α<br>↔ Intracellular TG<br>↓ Necrotic cell death<br>↔ Mitochondrial respiratory chain complex I<br>↔ Intracellular TG<br>↓ Necrotic cell death<br>↓ Apoptotic cell death<br>↓ ROS generation<br>↑ SOD2 mRNA expression<br>↑ Mitochondrial respiratory chain complex I | Metformin inhibited STAT3 mRNA and protein expression, resulting in autophagy restoration and alleviation of inflammation.<br>Metformin protected against palmitate induced necrotic and apoptotic cell death and decreased oxidative stress. |
| Geng <i>et al.</i> (2019) <sup>6</sup>      | Male Wistar rats hepatocytes<br>HepG2 cells                           | Palmitate (1.0 mmol)/ 12–16 hours<br>Palmitate (0.5 mmol)/ 12–16 hours | 1.0 mmol<br>1.0 mmol           | 30<br>30   |                                                                                                                                                                                                                                                                                                                                                                                  |                                                                                                                                                                                                                                               |

ACC, acetyl-CoA carboxylase; AML12, alpha mouse liver 12 hepatocyte; ER, endoplasmic reticulum; FAS, fatty acid synthase; HFD, high fat diet; IL, interleukin; L-ROCK1<sup>-/-</sup>, liver-specific ROCK-1 deficient mice; MCD, methionine- and choline-deficient diet; P-ACC, phosphorylation of acetyl-CoA carboxylase; ROCK1, Rho-kinase 1; ROS, reactive oxygen species; SCD1, stearoyl-CoA desaturase-1; SIRT1, sirtuin 1; SOD2, superoxide dismutase2; SREBP-1c, Sterol regulatory element-binding protein 1; STAT3, signal transducer and activator of transcription 3; TG, triglyceride content; TNF-α, tumor necrosis factor α; ↓, significant decrease; ↑, significant increase; ↔, no significant change.

**Supplementary Table 2.** Other Proposed Mechanisms of Metformin: Evidence from *In Vivo* Reports

| Reference                                     | Model (age)                            | Method                                          | Metformin (dose/route/duration)                               | Effects of metformin                                                                                                                                                       | Interpretations                                                                                                                                              |
|-----------------------------------------------|----------------------------------------|-------------------------------------------------|---------------------------------------------------------------|----------------------------------------------------------------------------------------------------------------------------------------------------------------------------|--------------------------------------------------------------------------------------------------------------------------------------------------------------|
| Karavia <i>et al.</i> (2015) <sup>7</sup>     | Male C57b1/6j mice (10–12 weeks old)   | - Western diet<br>- <i>Apoa1</i> <sup>-/-</sup> | - 300 mg/kg/day/PO/18 weeks<br>- 300 mg/kg/day/PO/18 weeks    | ↓ Hepatic TG<br>↓ Histologic steatosis<br>↔ Hepatic TG<br>↔ Histologic steatosis                                                                                           | ApoA-I deficiency blunted the beneficial effect of metformin on hepatic lipid content.                                                                       |
| Shin <i>et al.</i> (2017) <sup>8</sup>        | Male OLETF and LETO rats (6 weeks old) | - OLETF rats                                    | - 100 mg/kg/day/PO/12 weeks                                   | ↓ Hepatic TG<br>↔ Hepatic TC<br>↓ Fecal endotoxin, MDA                                                                                                                     | Metformin reduced fecal endotoxin contents.                                                                                                                  |
| Brandt <i>et al.</i> (2019) <sup>9</sup>      | Female C57b1/6j mice (6–8 weeks old)   | - Fat-fructose-and cholesterol-rich diet        | - 300 mg/kg/day/PO/4 days                                     | ↓ Hepatic TG<br>↓ Liver iNOS, 4NHE<br>↑ Occludin in prox. SB<br>↔ MMP13 in prox. SB<br>↔ Hepatic TG<br>↓ Liver iNOS, 4NHE<br>↔ Occludin in prox. SB<br>↓ MMP13 in prox. SB | Metformin treatment reversed the alteration of tight junction proteins in the proximal small intestine and the markers associated with bacterial endotoxins. |
| Stachowicz <i>et al.</i> (2012) <sup>10</sup> | Female C57BL/6j mice (8 weeks old)     | - apoE <sup>-/-</sup>                           | - 10 mg/kg/day/PO/16 weeks                                    | 3.2-fold ↑ GNM1                                                                                                                                                            | Metformin up-regulated GNM1.                                                                                                                                 |
| Guo <i>et al.</i> (2018) <sup>11</sup>        | Male C57b1/6j mice (3 weeks old)       | - HFD                                           | - 3 mg/kg/day/PO/5 weeks<br>- Starting after HFD for 12 weeks | ↓ Hepatic TG, TC<br>↓ SERPINA 12, INSIG1<br>↑ FABP2                                                                                                                        | Metformin alters the gene expression related to diabetes, obesity and fatty liver phenotypes.                                                                |

4HNE, 4-hydroxynonenal; ApoA-1, apolipoprotein A-1; *Apoa1*<sup>-/-</sup>, ApoA-I knock-out mice; apoE<sup>-/-</sup>, apolipoprotein E knock-out mutation; GNM1, glycine N-methyltransferase; HFD, high fat diet; iNOS, inducible nitric oxide synthase; LETO, Long-Evans Tokushima Otsuka rats; MDA, malondialdehyde; MMP13, matrix-metalloproteinase 13; OLETF, Otsuka Long-Evans Tokushima Fatty rat; PO, per oral; prox. SB, proximal small bowel; TC, total cholesterol contents; TG, triglyceride content; WT, wild type; ↓, significant decrease; ↑, significant increase; ↔, no significant change.

## REFERENCES

1. Fullerton MD, Galic S, Marcinko K, et al. Single phosphorylation sites in Acc1 and Acc2 regulate lipid homeostasis and the insulin-sensitizing effects of metformin. *Nat Med* 2013;19:1649-1654.
2. Song YM, Lee YH, Kim JW, et al. Metformin alleviates hepatosteatosis by restoring SIRT1-mediated autophagy induction via an AMP-activated protein kinase-independent pathway. *Autophagy* 2015;11:46-59.
3. Ford RJ, Fullerton MD, Pinkosky SL, et al. Metformin and salicylate synergistically activate liver AMPK, inhibit lipogenesis and improve insulin sensitivity. *Biochem J* 2015;468:125-132.
4. Huang H, Lee SH, Sousa-Lima I, et al. Rho-kinase/AMPK axis regulates hepatic lipogenesis during overnutrition. *J Clin Invest* 2018;128:5335-5350.
5. Li YL, Li XQ, Wang YD, Shen C, Zhao CY. Metformin alleviates inflammatory response in non-alcoholic steatohepatitis by restraining signal transducer and activator of transcription 3-mediated autophagy inhibition in vitro and in vivo. *Biochem Biophys Res Commun* 2019;513:64-72.
6. Geng Y, Hernández Villanueva A, Oun A, et al. Protective effect of metformin against palmitate-induced hepatic cell death. *Biochim Biophys Acta Mol Basis Dis* 2020;1866:165621.
7. Karavia EA, Hatziri A, Kalogeropoulou C, et al. Deficiency in apolipoprotein A-I ablates the pharmacological effects of metformin on plasma glucose homeostasis and hepatic lipid deposition. *Eur J Pharmacol* 2015;766:76-85.
8. Shin NR, Bose S, Wang JH, et al. Flos Lonicera combined with metformin ameliorates hepatosteatosis and glucose intolerance in association with gut microbiota modulation. *Front Microbiol* 2017;8:2271.
9. Brandt A, Hernández-Arriaga A, Kehm R, et al. Metformin attenuates the onset of non-alcoholic fatty liver disease and affects intestinal microbiota and barrier in small intestine. *Sci Rep* 2019;9:6668.
10. Stachowicz A, Suski M, Olszanecki R, Madej J, Okoń K, Korbut R. Proteomic analysis of liver mitochondria of apolipoprotein E knockout mice treated with metformin. *J Proteomics* 2012;77:167-175.
11. Guo J, Zhou Y, Cheng Y, et al. Metformin-induced changes of the coding transcriptome and non-coding RNAs in the livers of non-alcoholic fatty liver disease mice. *Cell Physiol Biochem* 2018;45:1487-1505.
